# Supplementary material
Source: PubMed Central journal article supplement (PMC283590)
Supplement: pnas_100_24_14321__2.pdf [file pnas_100_24_14321__2.pdf]

**Table 1. Primers used for QRT-PCR**

| Gene     | Forward primers (5'-3') | Reverse primers (5'-3')  | RT primers (5'-3')      |
|----------|-------------------------|--------------------------|-------------------------|
| bfrA     | GCTCCGCGAGCAATTTGAGGC   | AGTACGGCGCTGGTGGTGCCT    | GATGTGTTCTTCCTCGTCGGC   |
| hspX     | CCGAGCGCACCGAGCAGAAG    | GGTGGCCTTAATGTCGTCCTCGTC | AACCGCCACCGACACAGT      |
| icl1     | GCGGAGCAGATCCAGCAGGAAT  | GCGGCGGGCCAGCGTGTGCTC    | GCTGCTCCACAGCACCTC      |
| mbtB     | CCGATGCAGCACGCGATGT     | CCGGGCACCATCGAACTCG      | GGAGCCTGTCCGGATCGACC    |
| mls      | TGCTTCCCGAACCTGATGACTT  | CGTTGAGCACCGGCACCACCAG   | GCCATAAAGGCGTCGTAGA     |
| pca      | CTGCCACACCGAGTACGAC     | GACTCGAACGGCGCATAAC      | GACCAAGAGCAATTGCTTGC    |
| pckA     | GTCGATGCCGATGAATGGCG    | ACCGGTCGGCAGCTTCTC       | CAGGGCGTCGAACTCATCTTT   |
| sigA     | TGCAGTCGGTGCTGGACAC     | CGCGCAGGACCTGTGAGCGG     | CTGACATGGGGGCCCGTACGTTG |
| sigB     | CGCCGCCGGTGAAGTCGAA     | CAGGTCGCGTTTTTCGGTTCT    | CGCCGCCTCGCCATCAC       |
| sigE     | GTTGCCGACGGTGACGACTTG   | CGCGACCTGTTGGGGATGAG     | GACGGCTCCACCCACTG       |
| sigF     | GCGGGTCGGGCTGGTCAAC     | CCTCGCCCATGATGGTAGGAAC   | TGTCGCGGAAGTGTGTC       |
| sigH     | GGCAACCGCGGAGTATCC      | GCAGCCCGGTCGAGGAATG      | GTCCGGCAACGCTTCTAAC     |
| 16S rRNA | GAGATACTCGAGTGGCGAAC    | GGCCGGCTACCCGTCGTC       | GGAGTCTGGGCCGTATCTC     |
