# Supplementary material
Source: PubMed Central journal article supplement (PMC283590)
Supplement: pnas_100_24_14321__3.pdf [file pnas_100_24_14321__3.pdf]

**Table 2. Molecular beacons used for QRT-PCR**

| Gene     | Molecular beacons (fluorophore-5'-3')  |
|----------|----------------------------------------|
| bfrA     | FAM-CCAGGGGAATCGTCATGTGCCGGGAGCCCTGG   |
| hspX     | TET-GGCTCCCCTTCGTTCGCACGGTGTCCGGAGCC   |
| icl1     | TET-GCGAGGAAGGACGTACCCCGCACCCCTCGC     |
| mbtB     | FAM-CGTGGCCCAACAGCTCGGGGGGTAGCCACG     |
| mls      | TET-GCTCGCCTGAGATCACCACGACCGCGGAGC     |
| pca      | FAM-GCAGCCGTA CTGGGAGGCGTTACGAAAGGCTGC |
| pckA     | FAM-GGAGCGTGATCGAAGAATGGCTGCAGTTCGCTCC |
| sigA     | FAM-CCTCGCGTCGAAGTTGCGCCATCCGAGCGAGG   |
| sigB     | TET-CCACGGAAGCGCATAGAAGCCGGGCCGTGG     |
| sigE     | TET-CCAGGGATCACGACCATCACGACCTTGCCTGG   |
| sigF     | TET-GGGCCTTCGGACTTCGTCTCCTTCAGGCC      |
| sigH     | TET-CGCTCGCGATTGGCAACTGGCGTCCCGAGCG    |
| 16S rRNA | TET-CGAGCATAGGACCACGGGATGCAGCTCG       |
